# Supplementary material
Source: PubMed Central journal article supplement (PMC4201301)
Supplement: Supp_Fig1.pdf [file Supp_Fig1.pdf]

## Supplementary Data

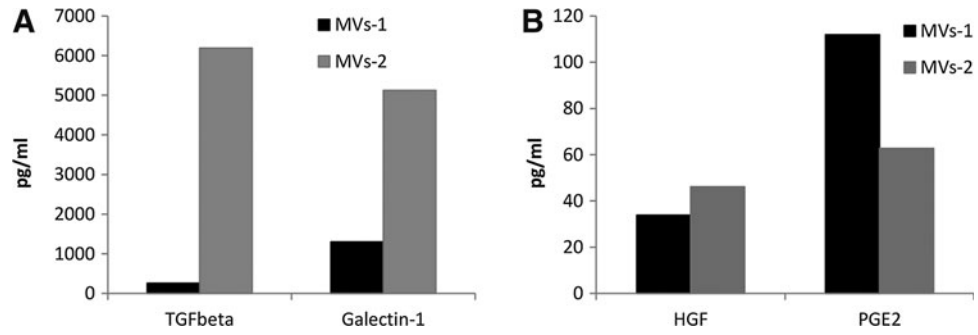

**SUPPLEMENTARY FIG. S1.** Concentrations of cytokines and growth factors by ELISA in both MV preparations. Results are expressed as pg/mL. **(A)** Measurement of TGF $\beta$  and Galectin-1. **(B)** Measurement of HGF and PGE2. The remaining bioactive factors (IL-2, IL-6, IL-10, GM-CSF, and IFN $\gamma$ ) were below the detection threshold. HGF, hepatocyte growth factor; PGE2, prostaglandin E2.
