# Supplementary material
Source: PubMed Central journal article supplement (PMC4201301)
Supplement: Supp_Fig2.pdf [file Supp_Fig2.pdf]

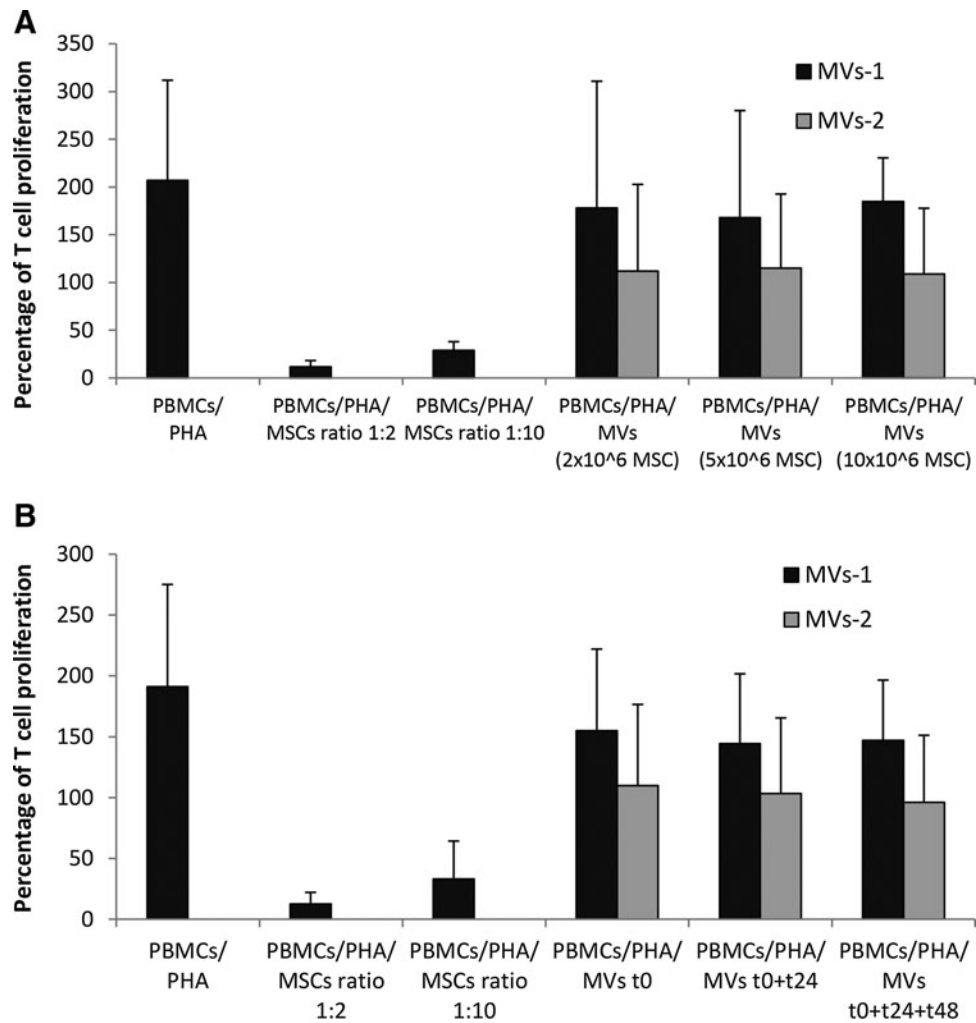

**SUPPLEMENTARY FIG. S2.** (A) In vitro immunomodulatory effect of MVs generated from increasing numbers of MSCs on T-cell proliferation. The graph shows that the addition of MVs obtained from increasing numbers of MSCs does not influence their inhibitory effect on T cells, which still remains lower than that of MSCs. (B) In vitro immunomodulatory effect of MVs added at different time points of the culture on T-cell proliferation. The graph shows that the addition of MVs at different time points of the culture does not influence their inhibitory effect on T cells which, also in this case, remains lower than that of MSCs added at t+0 of the co-culture. Each bar represents the percentage of proliferation of  $10^5$  PBMCs, calculated by measuring  $^3\text{H}$ -thymidine incorporation after 3-day co-culture, and is expressed as the median  $\pm$  SD of five experiments (each point being in triplicate). MSCs, mesenchymal stromal cells; MVs, microvesicles; PBMCs, peripheral blood mononuclear cells.
